# Supplementary material for: Barriers to maternal health services during the Ebola outbreak in three West African countries: a literature review
Source: PubMed Central journal article supplement — BMJ Glob Health. 2020 Sep 6;5(9):e002974. doi: 10.1136/bmjgh-2020-002974 (PMC7476472; doi:10.1136/bmjgh-2020-002974), 2020-09-06
Supplement: bmjgh-2020-002974supp001.pdf [file bmjgh-2020-002974supp001.pdf]

| Author(s)                 | Study Method  | Data Source                                                                                                     | Objective                                                                                                                        | Location                                      | Publication Year |
|---------------------------|---------------|-----------------------------------------------------------------------------------------------------------------|----------------------------------------------------------------------------------------------------------------------------------|-----------------------------------------------|------------------|
| Barden O'Fallon J, et al. | Mixed-Methods | Structured interviews with health workers; Retrospective analysis of public and private health facility records | Determine the indirect impact of Ebola on uptake and provision of reproductive, maternal, newborn, and child health services     | Guinea<br>12 prefectures and 3 city districts | 2015             |
| Bell SA, et al.           | Qualitative   | Semi-structured focus groups with Liberian health workers                                                       | Assess health worker perspectives on and experiences with the Ebola epidemic                                                     | Liberia<br>Bong County                        | 2017             |
| Black, BO                 | Commentary    | Author commentary as an OBGYN caring for Ebola patients                                                         | -                                                                                                                                | Sierra Leone                                  | 2014             |
| Brolin Ribacke K, et al.  | Quantitative  | Data collection at 32 public, private non-profit, and private for-profit health facilities' records             | Examine the effects of Ebola on facility-based births and Caesarean sections                                                     | Sierra Leone                                  | 2016             |
| Delamou A, et al.         | Quantitative  | Questionnaire self-administered to rural health workers providing maternal and child services                   | Explore knowledge, attitudes, and practices of maternal and child service providers before, during, and after the Ebola epidemic | Guinea<br>Forest and Lower regions            | 2017             |
| Drevin G, et al.          | Qualitative   | Semi-structured interviews with health workers providing Caesarean sections in 5 public hospitals               | Explore factors contributing to the continuation of Caesarean sections during the Ebola epidemic                                 | Sierra Leone                                  | 2019             |
| Dynes M, et al.           | Qualitative   | Focus group discussions with health workers,                                                                    | Explore perspectives on the risk of Ebola and                                                                                    | Sierra Leone<br>Kenema District               | 2015             |

|                                    |               |                                                                                                                                                                                                                |                                                                                                      |                                                 |      |
|------------------------------------|---------------|----------------------------------------------------------------------------------------------------------------------------------------------------------------------------------------------------------------|------------------------------------------------------------------------------------------------------|-------------------------------------------------|------|
|                                    |               | pregnant and lactating women                                                                                                                                                                                   | health facility service uptake                                                                       |                                                 |      |
| Elston JW, et al.                  | Mixed-Methods | Interviews and focus group discussions with a variety of key stakeholders, leaders, community members, health workers, and patients; Analysis of health facility attendance data; Analysis of safe burial data | Assess the impact of Ebola on the health system, including MHS                                       | Sierra Leone<br>Moyamba and Koinadugu districts | 2016 |
| Erland E and Dahl B                | Qualitative   | Semi-structured interviews with midwives caring for pregnant patients in 8 Ebola treatment centres                                                                                                             | Explore midwives' experiences caring for pregnant patients in Ebola treatment centres                | Sierra Leone                                    | 2017 |
| Evans D, Goldstein M, and Popova A | Modelling     | WHO and World Bank data                                                                                                                                                                                        | Model the impact of Ebola-related health worker mortality on maternal and under-5 mortality          | Guinea, Liberia, Sierra Leone                   | 2015 |
| Gizelis T, et al.                  | Mixed-Methods | Semi-structured interviews with health personnel; Focus groups with community members; Surveys with area females                                                                                               | Examine how the Ebola epidemic impacted maternal health services, specifically facility-based births | Liberia<br>Monrovia                             | 2017 |
| Jones S and Ameh C                 | Mixed-Methods | Interviews with health workers and service users; Analysis of changes in key facility functions                                                                                                                | Assess the impact of Ebola on service provision in basic and comprehensive emergency                 | Sierra Leone                                    | 2015 |

|                     |               |                                                                                                                                                                                                      |                                                                                                                                              |                         |      |
|---------------------|---------------|------------------------------------------------------------------------------------------------------------------------------------------------------------------------------------------------------|----------------------------------------------------------------------------------------------------------------------------------------------|-------------------------|------|
|                     |               |                                                                                                                                                                                                      | obstetric care units                                                                                                                         |                         |      |
| Jones S, et al.     | Qualitative   | Interviews with health workers and managers in 14 districts providing or supporting maternal and new-born services                                                                                   | Understand factors enabling and preventing nurse-midwives to continue MHS during the Ebola epidemic                                          | Sierra Leone            | 2017 |
| Jones S, et al.     | Quantitative  | Data collection on key indicators of maternal and new-born health services in health facilities                                                                                                      | Explore the impact of Ebola on availability, usage, and outcomes of basic and comprehensive maternal and new-born health services            | Sierra Leone            | 2016 |
| Jones T, et al.     | Mixed-Methods | Group discussions and 2 cross-sectional surveys with a variety of participants, including pregnant women, MHS providers, traditional birth providers, community leaders and women from the community | Conduct participatory action research with several objectives, including exploring the impact of Ebola on maternal health needs and services | Liberia<br>New Kru Town | 2018 |
| McQuilkin P, et al. | Quantitative  | Questionnaires with households within 1 hour from Liberia's 21 public hospitals in all 15 districts                                                                                                  | Assess the impact of Ebola on access to health facilities in urban and rural areas                                                           | Liberia                 | 2017 |

|                                                                                                                                                 |               |                                                                                                                                                                                                                                               |                                                                                                                                                                                                                                                          |                               |      |
|-------------------------------------------------------------------------------------------------------------------------------------------------|---------------|-----------------------------------------------------------------------------------------------------------------------------------------------------------------------------------------------------------------------------------------------|----------------------------------------------------------------------------------------------------------------------------------------------------------------------------------------------------------------------------------------------------------|-------------------------------|------|
| Miller N, et al.                                                                                                                                | Mixed-Methods | Interviews; Focus groups; Data analysis of service delivery before, during, and after the epidemic                                                                                                                                            | Explore the impact of Ebola on utilization and delivery of community-based maternal, newborn, and child services; Assess the role of community workers in the Ebola response; Illustrate ways community workers could have better supported the response | Guinea, Liberia, Sierra Leone | 2018 |
| Ministry of Social Welfare, Gender and Children's Affairs, UN Women Country Office-Sierra Leone, Statistics Sierra Leone, Oxfam GB/Sierra Leone | Mixed-Methods | Interviews, primarily with female Ebola survivors; Focus groups; Household questionnaires                                                                                                                                                     | Explore the extent of and the gendered impact of the Ebola epidemic                                                                                                                                                                                      | Sierra Leone                  | 2014 |
| UNFPA                                                                                                                                           | Mixed-Methods | Focus groups with a variety of participants; Interviews with health workers; Assessment of facility readiness for routine services and Ebola patients; Analysis of service usage trends before and after the start of the epidemic; Modelling | Explore the impact of Ebola on the perception, usage, provision, and outcomes of reproductive, maternal, newborn, child, and adolescent health and health services                                                                                       | Sierra Leone                  | 2015 |
